# Supplementary material for: Multimorbidity Burden and Incident Heart Failure Among People With and Without HIV: The HIV-HEART Study
Source: PubMed Central journal article supplement — Mayo Clin Proc Innov Qual Outcomes. 2022 May 3;6(3):218–27. doi: 10.1016/j.mayocpiqo.2022.03.004 (PMC9079699; doi:10.1016/j.mayocpiqo.2022.03.004), 2022-05-03
Supplement: mmc1.pdf [file mmc1.pdf]

## Online Data Supplement

Multimorbidity and incident heart failure among people with and without HIV: The HIV-HEART Study.

Matthew T. Mefford<sup>1</sup>, PhD, Michael J. Silverberg<sup>2</sup>, PhD, MPH, Thomas K. Leong<sup>2</sup>, MPH, Rulin C. Hechter<sup>1,3</sup>, PhD, William J. Towner<sup>1,4,5</sup>, MD, Alan S. Go<sup>2,3,6,7</sup>, MD, Michael Horberg<sup>3,8</sup>, MD, Haihong Hu<sup>8</sup>, MPH, MS, Teresa N. Harrison<sup>1</sup>, SM, Sue Hee Sung<sup>2</sup>, MPH, Kristi Reynolds<sup>1,3</sup>, PhD, MPH

<sup>1</sup>Department of Research and Evaluation, Kaiser Permanente Southern California, Pasadena, CA USA

<sup>2</sup>Division of Research, Kaiser Permanente Northern California, Oakland, CA USA

<sup>3</sup>Department of Health Systems Science, Kaiser Permanente Bernard J. Tyson School of Medicine, Pasadena, CA USA

<sup>4</sup>Department of Clinical Science, Kaiser Permanente Bernard J. Tyson School of Medicine, Pasadena, CA USA

<sup>5</sup>Department of Infectious Disease, Kaiser Permanente Los Angeles Medical Center, Los Angeles, CA USA

<sup>6</sup>Departments of Epidemiology, Biostatistics and Medicine, University of California, San Francisco, San Francisco, CA USA

<sup>7</sup>Department of Medicine, Stanford University, Palo Alto, CA USA

<sup>8</sup>Mid-Atlantic Permanente Research Institute, Kaiser Permanente Mid-Atlantic States, Rockville, MD USA

Address for correspondence and reprint requests: Matthew T. Mefford, Kaiser Permanente Southern California, Department of Research & Evaluation, 100 S. Los Robles, 2<sup>nd</sup> Floor, Pasadena, CA, 91101. Email: [matthew.t.mefford@kp.org](mailto:matthew.t.mefford@kp.org) Telephone: (626) 564-5950 Fax: (626) 564-3509

**Supplemental Table 1. Cumulative number of chronic comorbidities overall and among people without and with HIV**

|                   | Overall     |       |              | PWoH        |       |              | PWH        |       |              |
|-------------------|-------------|-------|--------------|-------------|-------|--------------|------------|-------|--------------|
|                   | N = 425,454 |       |              | N = 386,586 |       |              | N = 38,868 |       |              |
| Comorbidity count | N           | Row % | Cumulative % | N           | Row % | Cumulative % | N          | Row % | Cumulative % |
| 0                 | 254,159     | 59.7  | 59.7         | 230,691     | 59.7  | 59.7         | 23,468     | 60.4  | 60.4         |
| 1                 | 94,624      | 22.2  | 82.0         | 87,188      | 22.6  | 82.2         | 7,436      | 19.1  | 79.5         |
| 2                 | 42,226      | 9.9   | 91.9         | 38,388      | 9.9   | 92.2         | 3,838      | 9.9   | 89.4         |
| 3                 | 18,919      | 4.4   | 96.4         | 16,924      | 4.4   | 96.5         | 1,995      | 5.1   | 94.5         |
| 4                 | 8,757       | 2.1   | 98.4         | 7,595       | 2.0   | 98.5         | 1,162      | 3.0   | 97.5         |
| 5                 | 3,867       | 0.9   | 99.3         | 3,282       | 0.8   | 99.3         | 585        | 1.5   | 99.0         |
| 6                 | 1,730       | 0.4   | 99.7         | 1,477       | 0.4   | 99.7         | 253        | 0.7   | 99.7         |
| 7                 | 707         | 0.2   | 99.9         | 618         | 0.2   | 99.9         | 89         | 0.2   | 99.9         |
| 8                 | 300         | 0.1   | 100.0        | 273         | 0.1   | 100.0        | 27         | 0.1   | 100.0        |
| 9                 | 112         | 0.0   | 100.0        | 104         | 0.0   | 100.0        | 8          | 0.0   | 100.0        |
| 10                | 38          | 0.0   | 100.0        | 34          | 0.0   | 100.0        | 4          | 0.0   | 100.0        |
| 11                | 12          | 0.0   | 100.0        | 9           | 0.0   | 100.0        | 3          | 0.0   | 100.0        |
| 12+               | 3           | 0.0   | 100.0        | 3           | 0.0   | 100.0        | 0          | 0.0   | 100.0        |

Abbreviation: PWH, people with HIV; PWoH, people without HIV

**Supplemental Table 2. Number of events, person-years, and rates of incident heart failure among adults without and with HIV by multimorbidity burden.**

|                       | PWoH                |                     |                     |  | PWH                 |                     |                     |
|-----------------------|---------------------|---------------------|---------------------|--|---------------------|---------------------|---------------------|
| Multimorbidity Burden | 0-1                 | 2-3                 | ≥4                  |  | 0-1                 | 2-3                 | ≥4                  |
| Overall               |                     |                     |                     |  |                     |                     |                     |
| Events, N             | 1,960               | 918                 | 551                 |  | 292                 | 90                  | 66                  |
| Person-years          | 1,865,303           | 316,644             | 66,561              |  | 155,231             | 29,457              | 8,647               |
| Rate per 100 PY       | 0.11<br>(0.10-0.11) | 0.29<br>(0.27-0.31) | 0.83<br>(0.76-0.90) |  | 0.19<br>(0.17-0.21) | 0.31<br>(0.25-0.38) | 0.76<br>(0.60-0.97) |
| Age groups, years     |                     |                     |                     |  |                     |                     |                     |
| 21-34                 |                     |                     |                     |  |                     |                     |                     |
| Events, N             | 81                  | 14                  | 5                   |  | 25                  | 5                   | 2                   |
| Person-years          | 442,081             | 33,880              | 2,478               |  | 36,673              | 4,276               | 666                 |
| Rate per 100 PY       | 0.02<br>(0.01-0.02) | 0.04<br>(0.02-0.07) | 0.20<br>(0.08-0.48) |  | 0.07<br>(0.05-0.10) | 0.12<br>(0.05-0.28) | 0.30<br>(0.08-1.20) |
| 35-54                 |                     |                     |                     |  |                     |                     |                     |
| Events, N             | 1,228               | 478                 | 186                 |  | 164                 | 41                  | 26                  |
| Person-years          | 1,266,781           | 210,796             | 33,813              |  | 103,922             | 20,469              | 5,420               |
| Rate per 100 PY       | 0.10                | 0.23                | 0.55                |  | 0.16                | 0.20                | 0.48                |

|                 | (0.09-0.10)         | (0.21-0.25)         | (0.48-0.64)         |  | (0.14-0.18)         | (0.15-0.27)         | (0.33-0.70)         |
|-----------------|---------------------|---------------------|---------------------|--|---------------------|---------------------|---------------------|
| 55-64           |                     |                     |                     |  |                     |                     |                     |
| Events, N       | 463                 | 279                 | 203                 |  | 77                  | 31                  | 27                  |
| Person-years    | 135,165             | 57,646              | 19,819              |  | 12,582              | 3,824               | 1,823               |
| Rate per 100 PY | 0.34<br>(0.31-0.38) | 0.48<br>(0.43-0.54) | 1.02<br>(0.89-1.18) |  | 0.61<br>(0.49-0.77) | 0.81<br>(0.57-1.15) | 1.48<br>(1.02-2.16) |
| ≥65             |                     |                     |                     |  |                     |                     |                     |
| Events, N       | 188                 | 147                 | 157                 |  | 26                  | 13                  | 11                  |
| Person-years    | 21,275              | 14,321              | 10,450              |  | 2,052               | 886                 | 736                 |
| Rate per 100 PY | 0.88<br>(0.77-1.02) | 1.03<br>(0.87-1.21) | 1.50<br>(1.28-1.76) |  | 1.27<br>(0.86-1.86) | 1.47<br>(0.85-2.52) | 1.49<br>(0.83-2.70) |
| Male            |                     |                     |                     |  |                     |                     |                     |
| Events, N       | 1,812               | 831                 | 470                 |  | 251                 | 72                  | 60                  |
| Person-years    | 1,666,863           | 257,822             | 50,670              |  | 137,728             | 24,912              | 6,914               |
| Rate per 100 PY | 0.11<br>(0.10-0.11) | 0.32<br>(0.30-0.35) | 0.93<br>(0.85-1.02) |  | 0.18<br>(0.16-0.21) | 0.29<br>(0.23-0.36) | 0.87<br>(0.67-1.12) |
| Female          |                     |                     |                     |  |                     |                     |                     |
| Events, N       | 148                 | 87                  | 81                  |  | 41                  | 18                  | 6                   |
| Person-years    | 198,440             | 58,822              | 15,890              |  | 17,502              | 4,545               | 1,733               |

|                        |                     |                     |                     |  |                     |                     |                     |
|------------------------|---------------------|---------------------|---------------------|--|---------------------|---------------------|---------------------|
| Rate per 100 PY        | 0.07<br>(0.06-0.09) | 0.15<br>(0.12-0.18) | 0.51<br>(0.41-0.63) |  | 0.23<br>(0.17-0.32) | 0.40<br>(0.25-0.63) | 0.35<br>(0.16-0.77) |
| Race/ethnicity         |                     |                     |                     |  |                     |                     |                     |
| White                  |                     |                     |                     |  |                     |                     |                     |
| Events, N              | 945                 | 399                 | 263                 |  | 134                 | 40                  | 43                  |
| Person-years           | 838,219             | 152,803             | 31,133              |  | 69,166              | 14,754              | 4,522               |
| Rate per 100 PY        | 0.11<br>(0.11-0.12) | 0.26<br>(0.24-0.29) | 0.84<br>(0.75-0.95) |  | 0.19<br>(0.16-0.23) | 0.27<br>(0.20-0.37) | 0.95<br>(0.71-1.28) |
| Black                  |                     |                     |                     |  |                     |                     |                     |
| Events, N              | 613                 | 307                 | 186                 |  | 83                  | 31                  | 13                  |
| Person-years           | 381,759             | 85,948              | 21,863              |  | 31,131              | 7,141               | 2,443               |
| Rate per 100 PY        | 0.16<br>(0.15-0.17) | 0.36<br>(0.32-0.40) | 0.85<br>(0.74-0.98) |  | 0.27<br>(0.22-0.33) | 0.43<br>(0.31-0.62) | 0.53<br>(0.31-0.92) |
| Hispanic               |                     |                     |                     |  |                     |                     |                     |
| Events, N              | 238                 | 142                 | 79                  |  | 30                  | 11                  | 6                   |
| Person-years           | 381,531             | 51,402              | 9,890               |  | 32,947              | 4,822               | 1,263               |
| Rate per 100 PY        | 0.06<br>(0.05-0.07) | 0.28<br>(0.23-0.33) | 0.80<br>(0.64-1.00) |  | 0.09<br>(0.06-0.13) | 0.23<br>(0.13-0.41) | 0.47<br>(0.21-1.06) |
| Asian/Pacific Islander |                     |                     |                     |  |                     |                     |                     |

|                 |                     |                     |                     |  |                     |                     |                     |
|-----------------|---------------------|---------------------|---------------------|--|---------------------|---------------------|---------------------|
| Events, N       | 44                  | 19                  | 8                   |  | 8                   | 1                   | 4                   |
| Person-years    | 73,859              | 11,058              | 1,697               |  | 6,338               | 1,127               | 218                 |
| Rate per 100 PY | 0.06<br>(0.04-0.08) | 0.17<br>(0.11-0.27) | 0.47<br>(0.24-0.94) |  | 0.13<br>(0.06-0.25) | 0.09<br>(0.01-0.63) | 1.83<br>(0.69-4.87) |
| Other/Unknown   |                     |                     |                     |  |                     |                     |                     |
| Events, N       | 120                 | 51                  | 15                  |  | 37                  | 7                   | 0                   |
| Person-years    | 189,933             | 15,433              | 1,977               |  | 15,646              | 1,612               | 198                 |
| Rate per 100 PY | 0.06<br>(0.05-0.08) | 0.33<br>(0.25-0.43) | 0.76<br>(0.46-1.26) |  | 0.24<br>(0.17-0.33) | 0.43<br>(0.21-0.91) | --                  |

Abbreviation: PWH, people with HIV; PWOH, people without HIV; PY, person-years
